# Supplementary material for: Assessment of the Rhizosphere Bacterial Community under Maize Growth Using Various Agricultural Technologies with Biomodified Mineral Fertilizers
Source: MDPI journal article supplement (doi:10.3390/agronomy13071855), 2023-07-13
Supplement: s1 [file s1]

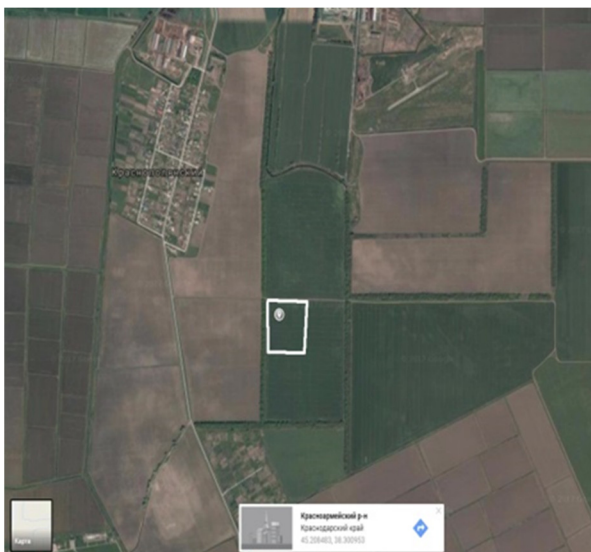

**Figure S1.** Coordinates of the experimental field of experience 45.209483, 38.300953.

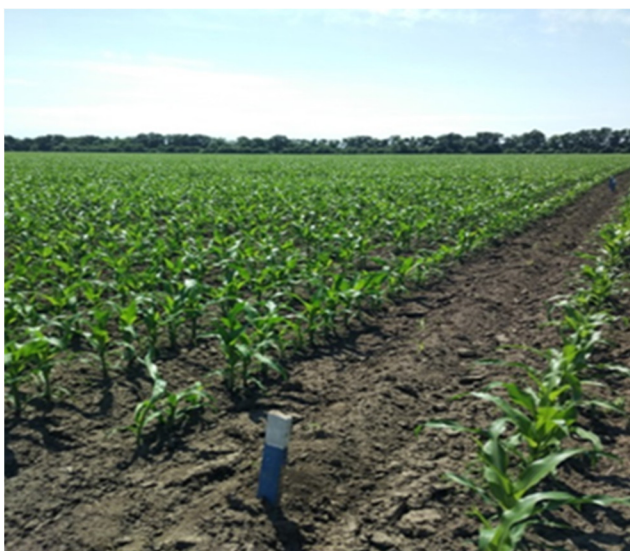

**Figure S2.** Growth of maize (*Zea mays* L.) Pioneer 9578 hybrid in phase 5-6 leaves (May, 27<sup>th</sup>, 2017).

Notes: A.- the control variant, with no mineral fertilizers and no BMF; B – the variant with ammophos addition (EuroChem Group); C- the variant with addition of bio- modified fertilizer BMF 1, the ammophos fertilizer with addition of spores of *Bacillus velezensis* BS89 on dry carrier (diatomite), D- BMF2, the “biocapsules”, ammophos granules treated with spores of *Bacillus velezensis* BS89 in cell suspension.

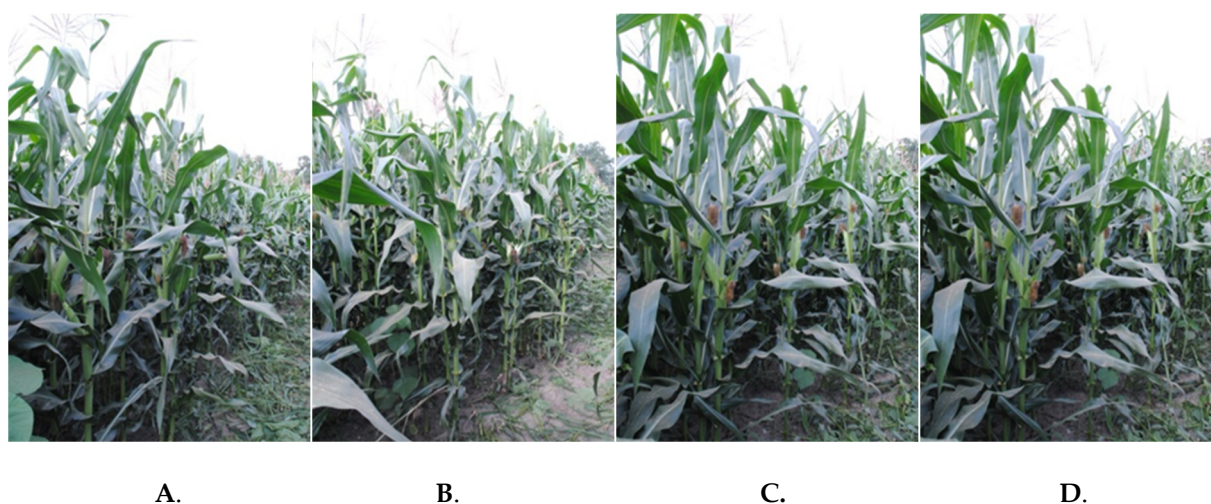

**Figure S3.** Growth of maize (Pioneer hybrid 9578) in flowering stage (16.07.2017).

Notes: A.- the control variant, with no mineral fertilizers and no BMF; B – the variant with ammophos addition (EuroChem Group); C- the variant with addition of bio- modified fertilizer BMF 1, the ammophos fertilizer with addition of spores of *Bacillus velezensis* BS89 on dry carrier (diatomite), D- BMF2, the “biocapsules”, ammophos granules treated with spores of *Bacillus velezensis* BS89 in cell suspension.

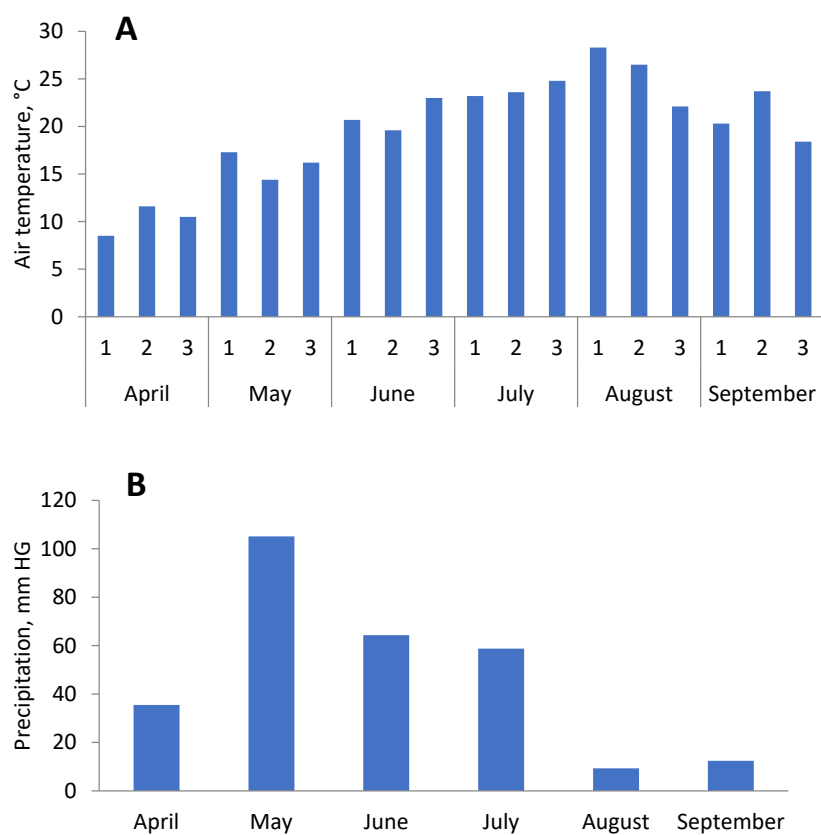

**Figure S4.** Meteorological data for the year of the field experiment (2017): **A** – air temperature, **B** – precipitation.

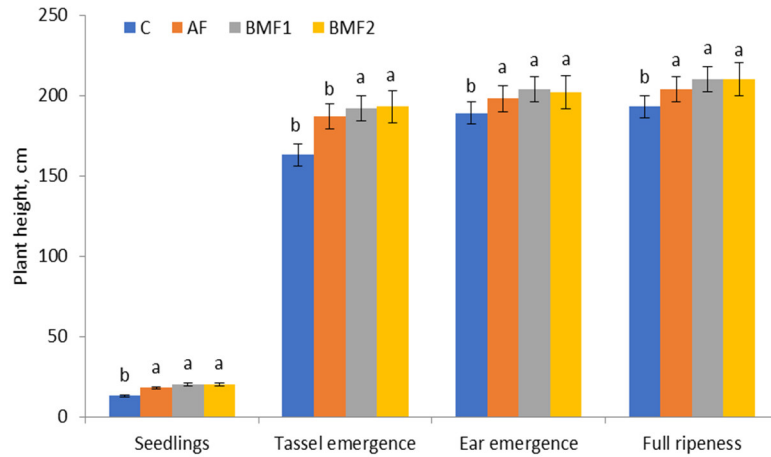

**Figure S5.** Plant height of maize plants (Pioneer P 9578 hybrid) at seedling, tassel emergence, ear emergence and full ripeness vegetation stages.

Notes: C – control plants (grown on fertilizer-free soil), AF – plants grown on soil fertilized with ammophos, BMF1 – plants grown on soil fertilized with BMF1 (ammophos with spores of *Bacillus velezensis* BS89 on dry carrier), BMF2 – plants grown on soil fertilized with BMF2 (ammophos pellets treated with spore suspension of *Bacillus velezensis* BS89). All data are presented as the mean  $\pm$  SE (standard error). Different letters indicate significant differences between treatments at  $p < 0.05$  in Duncan test

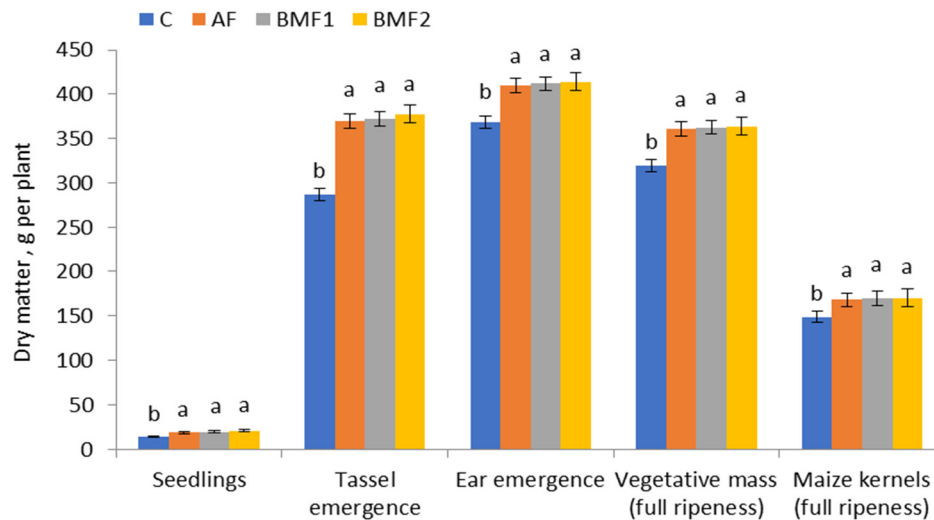

**Figure S6.** Dynamics of dry matter content in maize plants (Pioneer P 9578 hybrid) at seedling, tassel emergence, ear emergence and full ripeness vegetation stages.

Notes: C – control plants (grown on fertilizer-free soil), AF – plants grown on soil fertilized with ammophos, BMF1 – plants grown on soil fertilized with BMF1 (ammophos with spores of *Bacillus velezensis* BS89 on dry carrier), BMF2 – plants grown on soil fertilized with BMF2 (ammophos pellets treated with spore suspension of *Bacillus velezensis* BS89). All data are presented as the mean  $\pm$  SE (standard error). Different letters indicate significant differences between treatments at  $p < 0.05$  in Duncan test

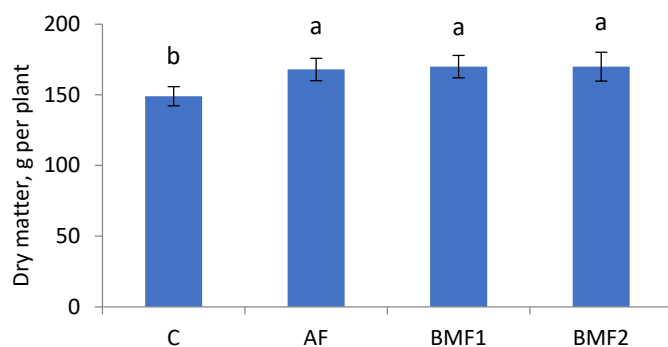

**Figure S7.** Dry matter content of maize (Pioneer P 9578 hybrid) kernels.

Notes: C – control plants (grown on fertilizer-free soil), AF – plants grown on soil fertilized with ammophos, BMF1 – plants grown on soil fertilized with BMF1 (ammophos with spores of *Bacillus velezensis* BS89 on dry carrier), BMF2 – plants grown on soil fertilized with BMF2 (ammophos pellets treated with spore suspension of *Bacillus velezensis* BS89). All data are presented as the mean  $\pm$  SE (standard error). Different letters indicate significant differences between treatments at  $p < 0.05$  in Duncan test

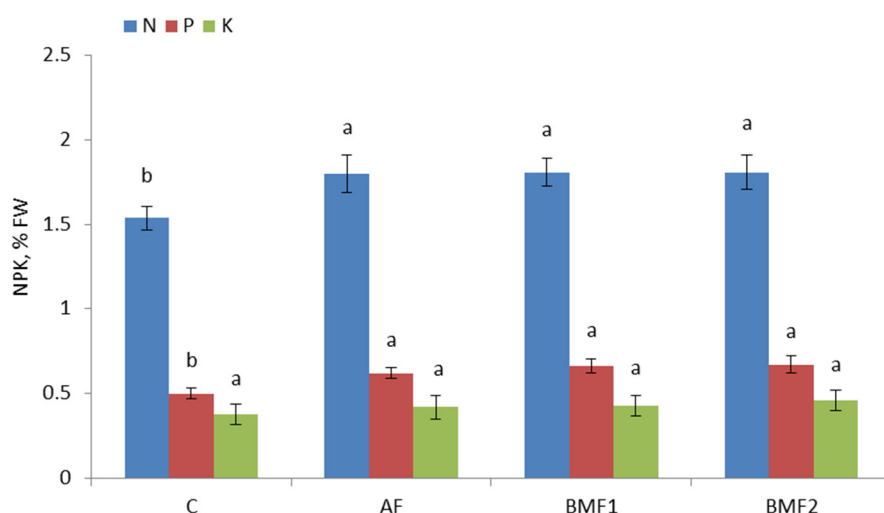

**Figure S8.** NPK content of maize (Pioneer P 9578 hybrid) kernels.

Notes: C – control plants (grown on fertilizer-free soil), AF – plants grown on soil fertilized with ammophos, BMF1 – plants grown on soil fertilized with BMF1 (ammophos with spores of *Bacillus velezensis* BS89 on dry carrier), BMF2 – plants grown on soil fertilized with BMF2 (ammophos granules treated with spore suspension of *Bacillus velezensis* BS89). All data are presented as the mean  $\pm$  SE (standard error). Different letters indicate significant differences between treatments at  $p < 0.05$  in Duncan test

**Table S1.** Effects of different fertilizers on the contents of available N-NO<sub>3</sub>, N-NH<sub>4</sub> and P<sub>2</sub>O<sub>5</sub> in rhizosphere soil of maize (Pioneer hybrid 9578) under different vegetative stages

| Vegetation Phase | Agrochemical Parameter                              | C               | AF              | BMF1            | BMF2            |
|------------------|-----------------------------------------------------|-----------------|-----------------|-----------------|-----------------|
| Tassel emergence | NO <sub>3</sub> , mg kg <sup>-1</sup>               | 19.6 $\pm$ 1.1c | 21.2 $\pm$ 1.4b | 22.8 $\pm$ 0.9a | 22.9 $\pm$ 1.0a |
|                  | NH <sub>4</sub> , mg kg <sup>-1</sup>               | 12.2 $\pm$ 0.8c | 15.8 $\pm$ 0.7b | 17.7 $\pm$ 0.7a | 17.8 $\pm$ 0.8a |
|                  | P <sub>2</sub> O <sub>5</sub> , mg kg <sup>-1</sup> | 56 $\pm$ 3b     | 73 $\pm$ 6a     | 76 $\pm$ 5a     | 77 $\pm$ 6a     |
| Ear emergence    | NO <sub>3</sub> , mg kg <sup>-1</sup>               | 12.3 $\pm$ 1.1c | 17.2 $\pm$ 1.0b | 18.8 $\pm$ 0.7a | 18.9 $\pm$ 0.7a |

|               |                                                     |          |          |          |          |
|---------------|-----------------------------------------------------|----------|----------|----------|----------|
|               | NH <sub>4</sub> , mg kg <sup>-1</sup>               | 7.3±0.4c | 8.0±0.5b | 9.2±0.4a | 9.3±0.5a |
|               | P <sub>2</sub> O <sub>5</sub> , mg kg <sup>-1</sup> | 44±3b    | 56±3a    | 57±4a    | 57±5a    |
|               | NO <sub>3</sub> , mg kg <sup>-1</sup>               | 5.0±0.5b | 8.2±0.8a | 9.1±0.5a | 9.2±0.6a |
|               | NH <sub>4</sub> , mg kg <sup>-1</sup>               | 4.3±0.4c | 6.1±0.5b | 7.1±0.5a | 7.1±0.7a |
| Full ripeness | P <sub>2</sub> O <sub>5</sub> , mg kg <sup>-1</sup> | 25±3b    | 42±5a    | 44±3a    | 44±4a    |

Notes: C – control plants (grown on fertilizer-free soil), AF – plants grown on soil fertilized with ammophos, BMF1 - plants grown on soil fertilized with BMF1 - plants grown on soil fertilized with BMF1 (ammophos with spores of *Bacillus velezensis* BS89 on dry carrier), BMF2 – plants grown on soil fertilized with BMF2 (ammophos granules treated with spore suspension of *Bacillus velezensis* BS89). All data are presented as the mean ± SE (standard error). Different letters indicate significant differences between treatments at  $p < 0.05$  in Duncan test

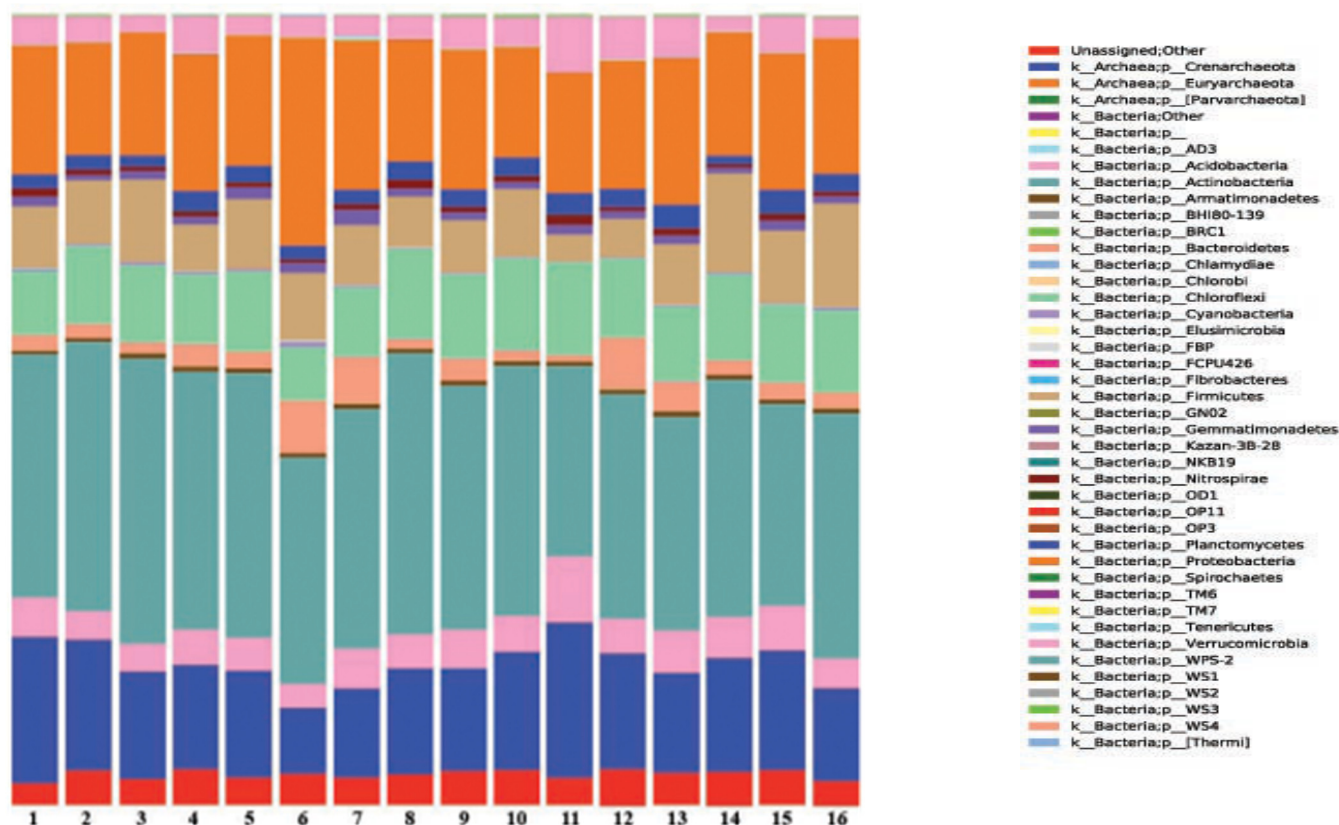

**Figure S9.** Taxonomic profile maize (Pioneer hybrid 9578) rhizosphere bacterial community when using various agricultural technologies. 1-4 control (C), 5-8 ammophos addition (AF), 9-12 ammophos with spores of *Bacillus velezensis* BS89 on dry carrier (BMF1); ammophos granules treated with a spore suspension of *Bacillus velezensis* BS89 (BMF2)

**Table S2.** The number of representatives of the main phyla of the microbiome of the rhizosphere of maize and bulk soil under different variants of fertilization

| OTU ID                     | C                     | AF                    | BMF-1                 | BMF-2                 | Bulk                  |
|----------------------------|-----------------------|-----------------------|-----------------------|-----------------------|-----------------------|
| Unassigned                 | 0.035776±<br>0.007757 | 0.035403±<br>0.002309 | 0.040194±<br>0.004268 | 0.040145±<br>0.00744  | 0.05308±<br>0.01233   |
| Archaea<br>_Crenarchaeota  | 0.184904±<br>0.02135  | 0.147627±<br>0.021852 | 0.189753±<br>0.020534 | 0.133408±<br>0.056758 | 0.127537±<br>0.01311  |
| Archaea<br>__Euryarchaeota | 0.000253±<br>9.73E-05 | 0.000113±<br>3.8E-05  | 0.000149±<br>0.000102 | 0.000323±<br>0.000219 | 0                     |
| Archaea<br>__Parvarchaeota | 0                     | 6.44E-06±<br>1.26E-05 | 0                     | 0                     | 0                     |
| Bacteria; Other            | 7.97E-05±<br>1.23E-05 | 2.17E-05±<br>2.11E-05 | 5.07E-05±<br>4.03E-05 | 2.26E-05±<br>1.58E-05 | 3.39E-05±<br>5.88E-06 |
| Bacteria                   | 5.53E-05±<br>3.17E-05 | 0                     | 0                     | 1.23E-05±<br>2.42E-05 | 0.000574±<br>0.001062 |
| Bacteria_AD3               | 1.43E-05±<br>1.65E-05 | 3.56E-05±<br>4.82E-05 | 1.74E-05±<br>2.96E-05 | 2.47E-05±<br>2.48E-05 | 0                     |
| Acidobacteria              | 0.039652±<br>0.006709 | 0.039794±<br>0.007955 | 0.052983±<br>0.01562  | 0.049764±<br>2.86E-05 | 0.034654±<br>0.004017 |
| Actinobacteria             | 0.32302±<br>0.020877  | 0.309742±<br>0.0299   | 0.27709±<br>0.026724  | 0.284945±<br>0.011066 | 0.297366±<br>0.039443 |
| Armatimonadetes            | 0.005058±<br>0.001186 | 0.005253±<br>0.000397 | 0.005297±<br>0.000355 | 0.005816±<br>0.016961 | 0.002562<br>0.000498  |
| BHI80-139                  | 0                     | 0                     | 1.63E-05±<br>1.88E-05 | 9.27E-06±<br>0.000499 | 0                     |
| BRC1                       | 0.000272±<br>6.99E-05 | 0.000189±<br>0.000151 | 0.00027±<br>0.000181  | 0.000254±<br>1.82E-05 | 0.000624±<br>0.000241 |
| Bacteroidetes              | 0.018763±<br>0.005614 | 0.038171±<br>0.025804 | 0.027113±<br>0.020863 | 0.023835±<br>7.01E-05 | 0.081682±<br>0.047447 |

|                  |                            |                       |                       |                       |                       |
|------------------|----------------------------|-----------------------|-----------------------|-----------------------|-----------------------|
| Chlamydiae       | 0.000457±<br>0.000198      | 0.0004±<br>0.000156   | 0.000529±<br>6.21E-05 | 0.000554±<br>0.008032 | 0.002037±<br>0.001845 |
| Chlorobi         | 0.000348±<br>0.000179      | 0.000346±<br>0.000255 | 0.000215±<br>5.16E-05 | 0.00019±<br>0.000427  | 0.000531±<br>0.000272 |
| Chloroflexi      | 0.087665±<br>0.007705      | 0.089182±<br>0.019127 | 0.1049±<br>0.007259   | 0.100922±<br>4.67E-05 | 0.040303±<br>0.01851  |
| Cyanobacteria    | 0.002643±<br>0.000445      | 0.002943±<br>0.002385 | 0.001126±<br>0.000351 | 0.001714±<br>0.007939 | 0.000503±<br>0.000111 |
| Elusimicrobia    | 0.000325±<br>0.000274      | 0.000344±<br>0.000166 | 0.00033±<br>5.76E-05  | 0.000266±<br>0.000703 | 0.000669±<br>0.000268 |
| FBP              | 0.000344±<br>0.000196      | 0.000838±<br>0.000587 | 0.000254±<br>0.000142 | 0.000346±<br>6.97E-05 | 0.000273±<br>0.000293 |
| FCPU426          | 7.17E-06±<br>8.24E-06      | 2.6E-05±<br>4.01E-05  | 1.37E-05±<br>2.32E-05 | 2.21E-05±<br>0.000173 | 2.15E-05±<br>4.21E-05 |
| Fibrobacteres    | 0.000214±<br>0.000185      | 8.8E-05±<br>3.26E-05  | 0.000142±<br>6.91E-05 | 0.000276±<br>2.33E-05 | 0.000103±<br>9.52E-05 |
| Firmicutes       | 0.077517±<br>0.017923      | 0.075179±<br>0.010496 | 0.056324±<br>0.018054 | 0.106139±<br>0.000192 | 0.060123±<br>0.005802 |
| GN02             | 3.13E-06±<br>6.14E-06      | 4.51E-05±<br>5.96E-05 | 1.78E-05±<br>2.23E-05 | 9.4E-06±<br>0.023403  | 3.14E-05±<br>3.65E-05 |
| Gemmatimonadetes | 0.009605±<br>0.002248      | 0.014138±<br>0.003714 | 0.009993±<br>2.23E-05 | 0.01035±<br>1.06E-05  | 0.011181±<br>0.00393  |
| Kazan-3B-28      |                            | 1.28E-05±<br>1.61E-05 | 3.48E-06±<br>5.91E-06 | 4.64E-06±<br>0.002934 |                       |
| NKB19            | 0<br>6.19E-06±<br>1.21E-05 |                       |                       |                       | 0                     |
| Nitrospirae      |                            | 0                     | 0                     | 0                     | 0                     |
|                  | 0.006502±                  | 0.006238±             | 0.00697±              | 0.006172±             | 0.001115±             |

|                 |                       |                           |                       |                       |                       |
|-----------------|-----------------------|---------------------------|-----------------------|-----------------------|-----------------------|
|                 | 0.002093              | 0.002801                  | 0.002966              | 9.09E-06              | 0.001216              |
| OD1             |                       |                           |                       | 9.08E-05±<br>0.002563 | 0.000455±<br>0.000343 |
|                 | 0.000245±<br>0.000223 | 7.81E-05<br>2.36E-05<br>± | 9.34E-05±<br>7.17E-05 |                       |                       |
| OP11            |                       |                           |                       | 1.93E-05±<br>1.48E-05 | 0.000205±<br>0.000175 |
|                 | 6.7E-05±<br>8.96E-05  | 0.000109±<br>7.64E-05     | 4.59E-05±<br>3.06E-05 |                       |                       |
| OP3             |                       |                           |                       | 9.52E-06±<br>2.35E-05 | 5.52E-05±<br>6.01E-05 |
|                 | 1.52E-05±<br>2.24E-05 | 1.81E-05±<br>3.54E-05     | 3.57E-05±<br>3.67E-05 |                       |                       |
| Planctomycetes  |                       |                           |                       | 0.02406±<br>1.87E-05  | 0.030126±<br>0.00957  |
|                 | 0.018307±<br>0.00418  | 0.019169±<br>0.002552     | 0.023374±<br>0.002111 |                       |                       |
| Proteobacteria  |                       |                           |                       | 0.171611±<br>0.01003  | 0.200144±<br>0.025534 |
|                 | 0.152561±<br>0.012301 | 0.185906±<br>0.04603      | 0.151104±<br>0.012674 |                       |                       |
| Spirochaetes    |                       |                           |                       |                       | 8.18E-05±<br>8.55E-05 |
|                 | 0                     | 0                         | 0                     | 0                     |                       |
| TM6             |                       |                           |                       | 6.37E-05±<br>0.018325 | 0.00014<br>8.53E-05   |
|                 | 7.3E-05±<br>6.16E-05  | 3.45E-05±<br>1.19E-05     | 5.21E-05±<br>1.92E-05 |                       |                       |
| TM7             |                       |                           |                       | 0.000564±<br>4.29E-05 | 0.002075±<br>0.001157 |
|                 | 0.000572±<br>0.000232 | 0.00064±<br>0.000156      | 0.000619±<br>0.000413 |                       |                       |
| Tenericutes     |                       |                           |                       | 0.000356±<br>0.000283 | 0.001012±<br>0.001113 |
|                 | 0.000287±<br>0.000277 | 0.001123±<br>0.001957     | 0.000436±<br>0.000368 |                       |                       |
| Verrucomicrobia |                       |                           |                       | 0.035802±<br>0.000211 | 0.049877±<br>0.017286 |
|                 | 0.032559±<br>0.009767 | 0.025199±<br>0.001961     | 0.04811±<br>0.01254   |                       |                       |
| WPS-2           |                       |                           |                       | 5.64E-05±<br>0.01644  | 0.000341±<br>0.000311 |
|                 | 1.15E-05±<br>2.25E-05 | 8.61E-06±<br>1.69E-05     | 2E-05±<br>1.34E-05    |                       |                       |



|                     |                       |                       |                       |                       |                       |
|---------------------|-----------------------|-----------------------|-----------------------|-----------------------|-----------------------|
| WS1                 | 2.3E-05±<br>4.51E-05  |                       |                       |                       |                       |
|                     |                       | 0                     | 0                     | 0                     | 0                     |
| WS2                 |                       |                       |                       | 6.18E-05±<br>6.38E-05 | 7.55E-05±<br>7.76E-05 |
|                     | 8.5E-05±<br>8.15E-05  | 5.42E-05±<br>4.46E-05 | 2.76E-05±<br>2.71E-05 |                       |                       |
| WS3                 |                       |                       |                       | 0.001715±<br>3.62E-05 | 0.000146±<br>0.000205 |
|                     | 0.001575±<br>0.000426 | 0.001063±<br>0.000415 | 0.002301±<br>0.000621 |                       |                       |
| WS4                 |                       |                       |                       | 5.65E-05±<br>0.000629 |                       |
|                     | 8.74E-05±<br>5.22E-05 | 3.46E-05±<br>2.76E-05 | 2.67E-05±<br>1.85E-05 |                       |                       |
| [Thermi]_Deinococci |                       |                       |                       |                       | 0                     |
|                     | 4.78E-05±<br>6.71E-05 |                       | 3.91E-06±<br>6.64E-06 | 7.72E-06±<br>5.46E-05 | 0.000263±<br>5.37E-05 |
|                     |                       | 0.000427±<br>0.000769 |                       |                       |                       |
| Total               | 1                     | 1                     | 1                     | 1                     | 1                     |

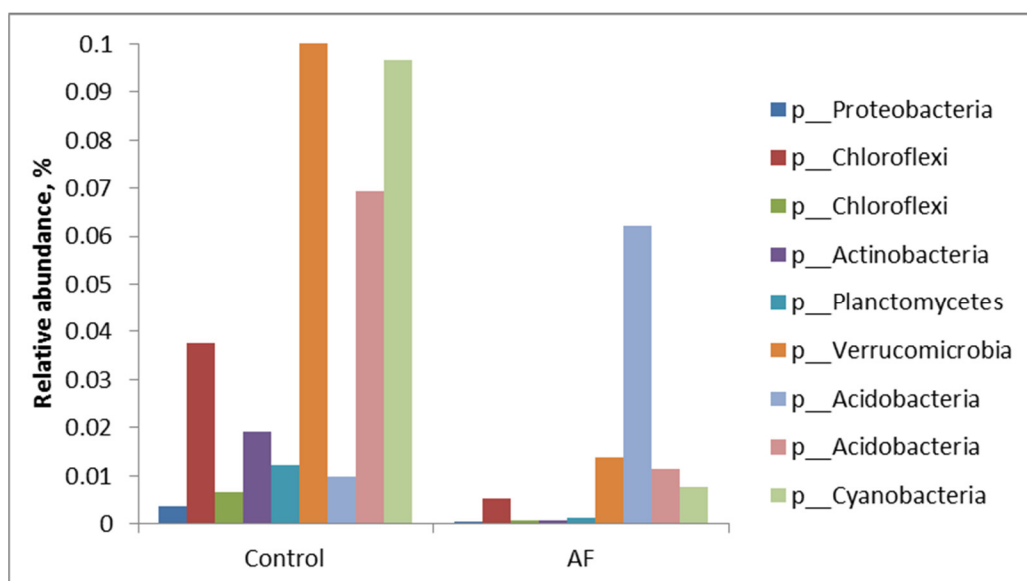

**Figure S10.** Changes in the composition of the minor microbial community in the control and ammophos (AF) experimental variants.

Notes (Figure S10):

k\_\_Bacteria;p\_\_Proteobacteria;c\_\_Alphaproteobacteria;o\_\_Rhizobiales;f\_\_Bradyrhizobiaceae;g\_\_Bosea

k\_\_Bacteria;p\_\_Chloroflexi;c\_\_TK17;o\_\_mle1-48;f\_\_g\_\_

k\_\_Bacteria;p\_\_Chloroflexi;c\_\_Anaerolineae;o\_\_WCHB1-50;f\_\_g\_\_

k\_\_Bacteria;p\_\_Actinobacteria;c\_\_Acidimicrobiia;o\_\_Acidimicrobiales;f\_\_koll13;g\_\_

k\_\_Bacteria;p\_\_Planctomycetes;c\_\_o\_\_f\_\_g\_\_

k\_\_Bacteria;p\_\_Verrucomicrobia;c\_\_[Pedosphaerae];o\_\_[Pedosphaerales];f\_\_auto67\_4W;g\_\_

k\_\_Bacteria;p\_\_Acidobacteria;c\_\_Solibacteres;o\_\_Solibacterales;f\_\_Solibacteraceae;g\_\_

k\_\_Bacteria;p\_\_Acidobacteria;c\_\_o\_\_f\_\_g\_\_

k\_\_Bacteria;p\_\_Cyanobacteria;c\_\_Nostocophycideae;o\_\_Nostocales;f\_\_Nostocaceae;g\_\_

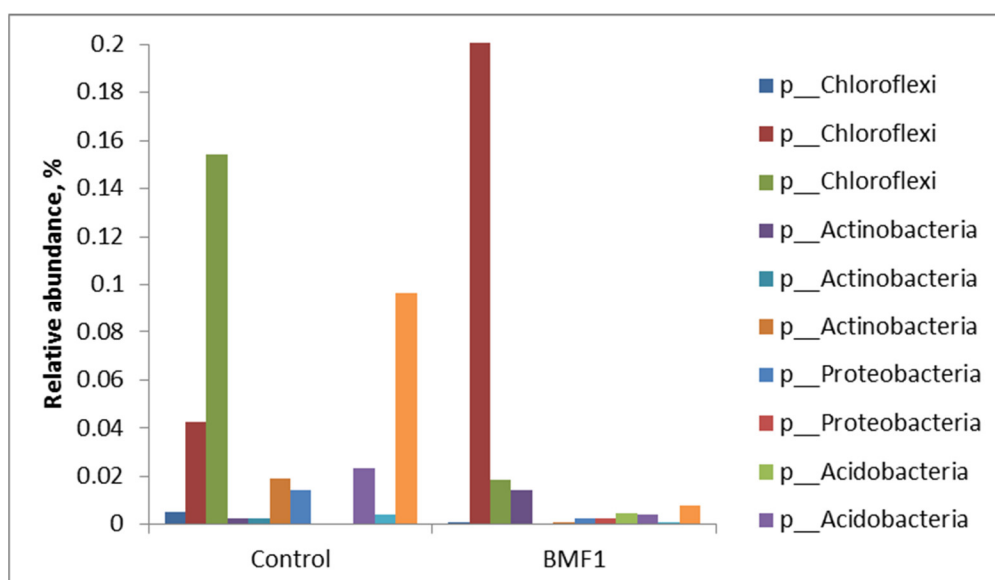

**Figure S11.** Changes in the composition of the minor microbial community in the control and BMF1 experimental variants.

Notes (Figure S11):

k\_\_Bacteria;p\_\_Chloroflexi;c\_\_TK10;o\_\_AKYG885;f\_\_g\_\_

k\_\_Bacteria;p\_\_Chloroflexi;c\_\_Ktedonobacteria;o\_\_Thermogemmatisporales;f\_\_Thermogemmatisporaceae;g\_\_

k\_\_Bacteria;p\_\_Chloroflexi;c\_\_Anaerolineae;o\_\_Caldilineales;f\_\_Caldilineaceae;g\_\_Caldilinea

k\_\_Bacteria;p\_\_Actinobacteria;c\_\_Actinobacteria;o\_\_Actinomycetales;f\_\_Frankiaceae;Other

k\_\_Bacteria;p\_\_Actinobacteria;c\_\_Actinobacteria;o\_\_Actinomycetales;f\_\_Cellulomonadaceae;g\_\_Actinotalea

k\_\_Bacteria;p\_\_Actinobacteria;c\_\_Acidimicrobiia;o\_\_Acidimicrobiales;f\_\_koll13;g\_\_

k\_\_Bacteria;p\_\_Proteobacteria;c\_\_Betaproteobacteria;o\_\_Burkholderiales;f\_\_Alcaligenaceae;g\_\_

k\_\_Bacteria;p\_\_Proteobacteria;c\_\_Gammaproteobacteria;o\_\_34P16;f\_\_g\_\_

k\_\_Bacteria;p\_\_Acidobacteria;c\_\_Acidobacteriia;o\_\_Acidobacteriales;f\_\_Acidobacteriaceae;g\_\_

k\_\_Bacteria;p\_\_Acidobacteria;c\_\_[Chloracidobacteria];o\_\_11-24;f\_\_g\_\_

k\_\_Bacteria;p\_\_Firmicutes;c\_\_Clostridia;o\_\_SHA-98;f\_\_g\_\_

k\_\_Bacteria;p\_\_Cyanobacteria;c\_\_Nostocophycideae;o\_\_Nostocales;f\_\_Nostocaceae;g\_\_

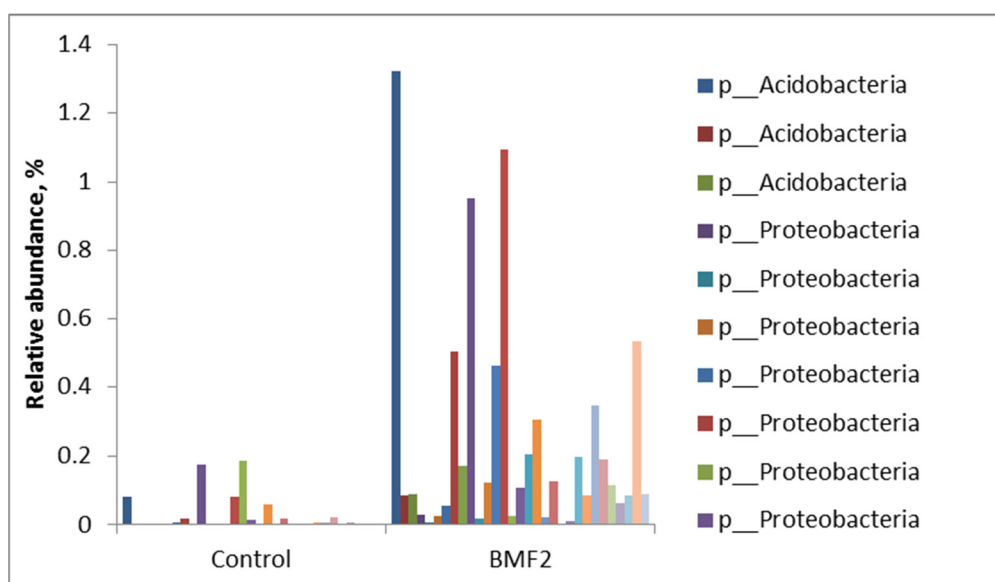

**Figure S12.** Changes in the composition of the minor microbial community in the control and BMF2 experimental variants.

Notes (Figure S12):

k\_\_Bacteria;p\_\_Acidobacteria;c\_\_Solibacteres;o\_\_Solibacterales;f\_\_Solibacteraceae;g\_\_  
k\_\_Bacteria;p\_\_Acidobacteria;c\_\_iii1-8;o\_\_32-20;f\_\_g\_\_  
k\_\_Bacteria;p\_\_Acidobacteria;c\_\_[Chloracidobacteria];o\_\_11-24;f\_\_g\_\_  
k\_\_Bacteria;p\_\_Proteobacteria;c\_\_Alphaproteobacteria;o\_\_Sphingomonadales;Other;Other  
k\_\_Bacteria;p\_\_Proteobacteria;c\_\_Alphaproteobacteria;o\_\_Rhodobacterales;f\_\_Hyphomonadaceae;g\_\_  
k\_\_Bacteria;p\_\_Proteobacteria;c\_\_Alphaproteobacteria;o\_\_Rickettsiales;f\_\_mitochondria;g\_\_Vermamoeba  
k\_\_Bacteria;p\_\_Proteobacteria;c\_\_Alphaproteobacteria;o\_\_BD7-3;f\_\_g\_\_  
k\_\_Bacteria;p\_\_Proteobacteria;c\_\_Betaproteobacteria;o\_\_Burkholderiales;f\_\_Comamonadaceae;g\_\_Ramlibacter  
k\_\_Bacteria;p\_\_Proteobacteria;c\_\_Betaproteobacteria;o\_\_IS-44;f\_\_g\_\_  
k\_\_Bacteria;p\_\_Proteobacteria;c\_\_Deltaproteobacteria;o\_\_Myxococcales;Other;Other  
k\_\_Bacteria;p\_\_Proteobacteria;c\_\_Gammaproteobacteria;o\_\_Methylococcales;f\_\_Methylococcaceae;g\_\_Methylobacter  
k\_\_Bacteria;p\_\_Proteobacteria;c\_\_Gammaproteobacteria;o\_\_Pseudomonadales;f\_\_Pseudomonadaceae;Other  
k\_\_Bacteria;p\_\_Proteobacteria;c\_\_Gammaproteobacteria;o\_\_Legionellales;f\_\_Legionellaceae;g\_\_Tatlockia  
k\_\_Bacteria;p\_\_Chloroflexi;c\_\_Chloroflexi;o\_\_[Roseiflexales];f\_\_g\_\_  
k\_\_Bacteria;p\_\_Chloroflexi;c\_\_Ktedonobacteria;o\_\_Thermogemmatissporales;f\_\_Thermogemmatissporaceae;g\_\_  
k\_\_Bacteria;p\_\_Chloroflexi;c\_\_Anaerolineae;o\_\_GCA004;f\_\_g\_\_  
k\_\_Bacteria;p\_\_Chloroflexi;c\_\_Anaerolineae;o\_\_f\_\_g\_\_  
k\_\_Bacteria;p\_\_Chloroflexi;c\_\_o\_\_f\_\_g\_\_  
k\_\_Bacteria;p\_\_Actinobacteria;c\_\_Actinobacteria;o\_\_Actinomycetales;f\_\_Micrococcaceae;g\_\_Microbispora  
k\_\_Bacteria;p\_\_Actinobacteria;c\_\_Actinobacteria;o\_\_Actinomycetales;f\_\_Propionibacteriaceae;g\_\_Microlunatus  
k\_\_Bacteria;p\_\_Actinobacteria;c\_\_Actinobacteria;o\_\_Actinomycetales;f\_\_Nakamurellaceae;g\_\_  
k\_\_Bacteria;p\_\_Actinobacteria;c\_\_Actinobacteria;o\_\_Actinomycetales;f\_\_Nocardiaceae;g\_\_  
k\_\_Bacteria;p\_\_Actinobacteria;c\_\_Acidimicrobiia;o\_\_Acidimicrobiales;f\_\_koll13;g\_\_  
k\_\_Bacteria;p\_\_Actinobacteria;c\_\_Thermoleophilia;o\_\_Solirubrobacterales;f\_\_Conexibacteraceae;g\_\_Conexibacter  
k\_\_Bacteria;p\_\_Gemmatimonadetes;c\_\_Gemmatimonadetes;o\_\_C114;f\_\_g\_\_  
k\_\_Bacteria;p\_\_Gemmatimonadetes;c\_\_Gemm-5;o\_\_f\_\_g\_\_  
k\_\_Bacteria;p\_\_Firmicutes;c\_\_Bacilli;o\_\_Bacillales;f\_\_Planococcaceae;g\_\_Planomicrobium  
k\_\_Bacteria;p\_\_Cyanobacteria;c\_\_Nostocophycideae;o\_\_Nostocales;f\_\_Nostocaceae;g\_\_  
k\_\_Bacteria;p\_\_Chlamydiae;c\_\_Chlamydiia;o\_\_Chlamydiales;f\_\_Parachlamydiaceae;g\_\_Parachlamydia  
k\_\_Bacteria;Other;Other;Other;Other;Other  
k\_\_Bacteria;p\_\_c\_\_o\_\_f\_\_g\_\_

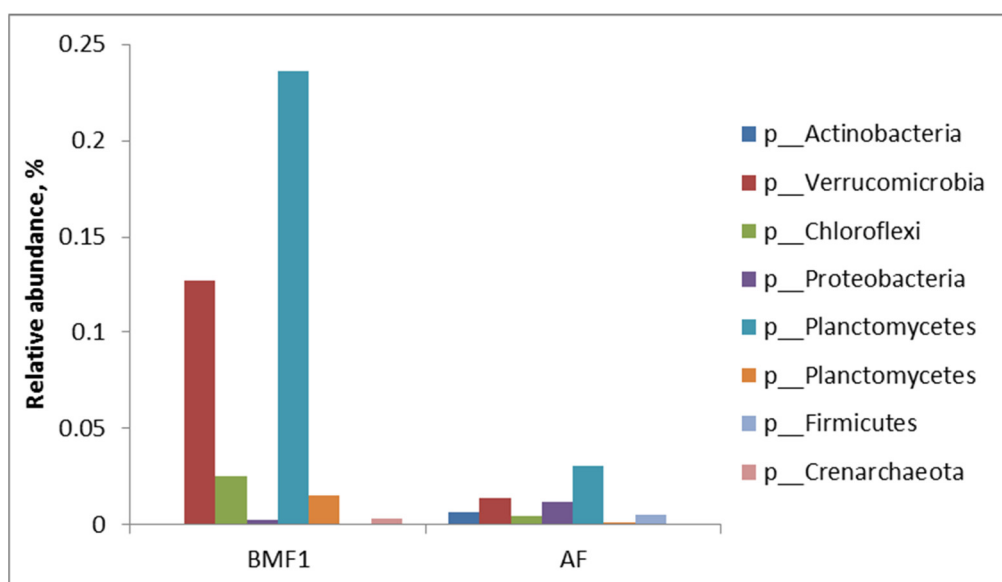

**Figure S13.** Changes in the composition of the minor microbial community in the BMF1 and ammophos experimental variants.

Notes (Figure S13):

k\_Bacteria;p\_Actinobacteria;c\_Actinobacteria;o\_Actinomycetales;f\_Cellulomonadaceae;g\_Actinotalea  
k\_Bacteria;p\_Verrucomicrobia;c\_[Pedosphaerae];o\_[Pedosphaerales];f\_auto67\_4W;g\_  
k\_Bacteria;p\_Chloroflexi;c\_Anaerolineae;o\_H39;f\_g\_  
k\_Bacteria;p\_Proteobacteria;c\_Betaproteobacteria;o\_Burkholderiales;f\_Alcaligenaceae;g\_  
k\_Bacteria;p\_Planctomycetes;c\_OM190;o\_CL500-15;f\_g\_  
k\_Bacteria;p\_Planctomycetes;c\_o\_;f\_g\_  
k\_Bacteria;p\_Firmicutes;c\_Bacilli;o\_Bacillales;f\_Bacillaceae;g\_Marinibacillus  
k\_Archaea;p\_Crenarchaeota;c\_Thaumarchaeota;o\_Nitrososphaerales;f\_Nitrososphaeraceae;g\_

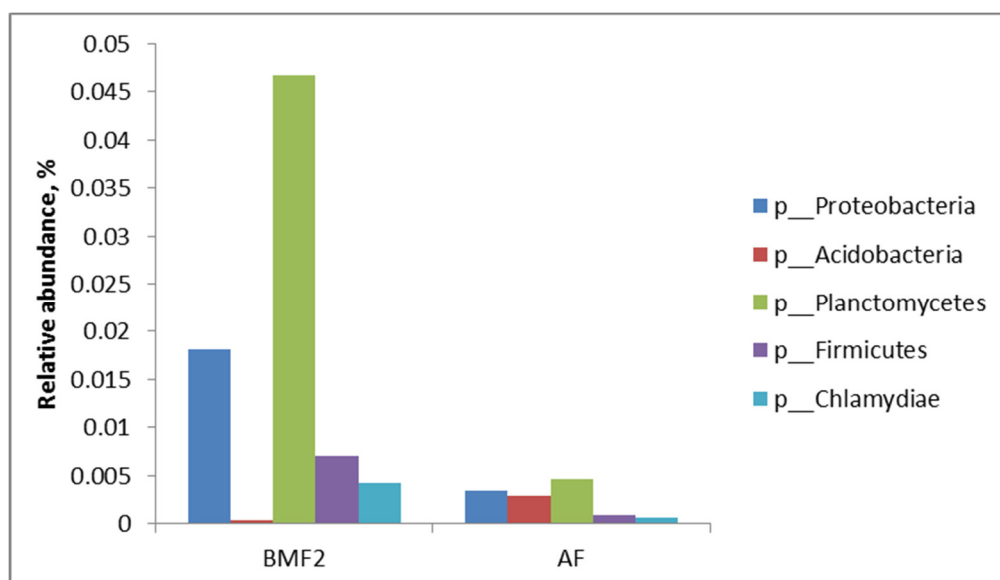

**Figure S14.** Changes in the composition of the minor microbial community in the BMF2 and ammophos experimental variants.

Notes (Figure S14):

k\_\_Bacteria;p\_\_Proteobacteria;c\_\_Alphaproteobacteria;o\_\_Rhizobiales;f\_\_Phyllobacteriaceae;g\_\_Phyllobacterium  
 k\_\_Bacteria;p\_\_Acidobacteria;c\_\_Solibacteres;o\_\_Solibacterales;f\_\_[Bryobacteraceae];g\_\_  
 k\_\_Bacteria;p\_\_Planctomycetes;c\_\_C6;o\_\_MVS-107;f\_\_g\_\_  
 k\_\_Bacteria;p\_\_Firmicutes;c\_\_Bacilli;o\_\_Bacillales;f\_\_Bacillaceae;g\_\_Anaerobacillus  
 k\_\_Bacteria;p\_\_Chlamydiae;c\_\_Chlamydiia;o\_\_Chlamydiales;f\_\_Parachlamydiaceae;g\_\_Parachlamydia

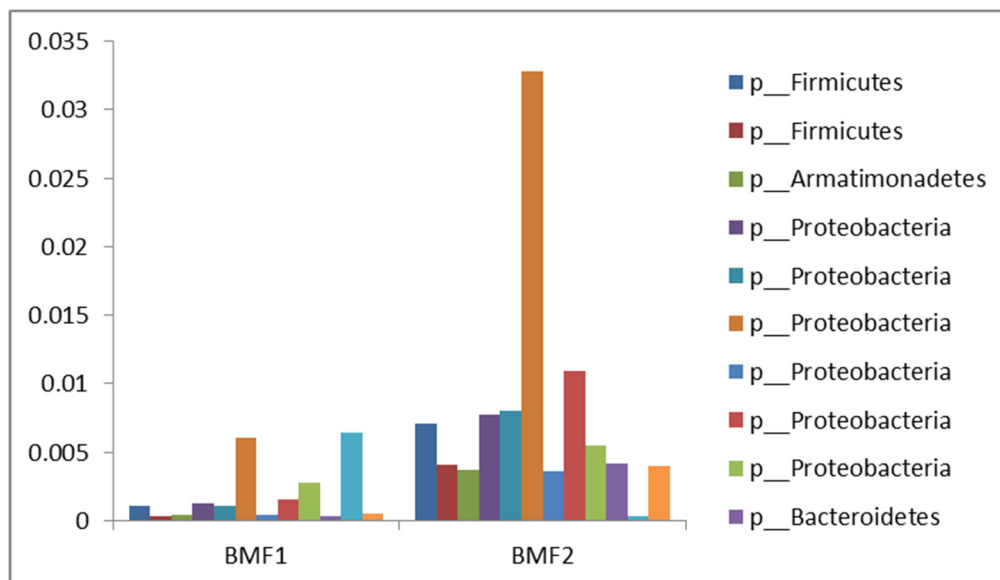

**Figure S15.** Changes in the composition of the minor microbial community in the BMF1 and BMF2 experimental variants.

Notes (Figure S15):

k\_\_Bacteria;p\_\_Firmicutes;c\_\_Bacilli;o\_\_Bacillales;f\_\_Bacillaceae;g\_\_Anaerobacillus  
 k\_\_Bacteria;p\_\_Firmicutes;c\_\_Bacilli;o\_\_Bacillales;f\_\_Bacillaceae;g\_\_Marinibacillus  
 k\_\_Bacteria;p\_\_Armatimonadetes;c\_\_Chthonomonadetes;o\_\_Chthonomonadales;Other;Other  
 k\_\_Bacteria;p\_\_Proteobacteria;c\_\_Alphaproteobacteria;o\_\_Rhodobacterales;f\_\_Rhodobacteraceae;g\_\_Rubellimicrobium  
 k\_\_Bacteria;p\_\_Proteobacteria;c\_\_Alphaproteobacteria;o\_\_Rhizobiales;f\_\_Rhizobiaceae;g\_\_Kaistia  
 k\_\_Bacteria;p\_\_Proteobacteria;c\_\_Alphaproteobacteria;o\_\_Rickettsiales;f\_\_mitochondria;g\_\_Acanthamoeba  
 k\_\_Bacteria;p\_\_Proteobacteria;c\_\_Betaproteobacteria;o\_\_Methylophilales;f\_\_g\_\_  
 k\_\_Bacteria;p\_\_Proteobacteria;c\_\_Deltaproteobacteria;o\_\_Myxococcales;f\_\_Myxococcaceae;g\_\_  
 k\_\_Bacteria;p\_\_Proteobacteria;c\_\_Gammaproteobacteria;o\_\_Xanthomonadales;f\_\_Xanthomonadaceae;g\_\_Luteimonas  
 k\_\_Bacteria;p\_\_Bacteroidetes;c\_\_Cytophagia;o\_\_Cytophagales;f\_\_[Amoebophilaceae];g\_\_Candidatus Amoebophilus  
 k\_\_Bacteria;p\_\_Bacteroidetes;c\_\_Sphingobacteriia;o\_\_Sphingobacteriales;f\_\_Sphingobacteriaceae;g\_\_Sphingobacterium  
 k\_\_Bacteria;p\_\_OD1;c\_\_ZB2;o\_\_f\_\_g\_\_
